# Supplementary material for: A facile method to study the bioaccumulation kinetics of amorphous silica nanoparticles by quantum dot embedding
Source: Royal Society of Chemistry journal article supplement (doi:10.1039/c8en00387d), 2018-01-01
Supplement: c8en00387d1.pdf [file c8en00387d1.pdf]

**Supporting Information for**

**A facile method to study the bioaccumulation kinetics of  
amorphous silica nanoparticles by quantum dot embedding**

Xiao-Mei Zang<sup>#</sup>, Jia-Ming Li<sup>#</sup>, Ying Wang, Yue-Yue Liu, Zhong-Bo Wei, Liuyan Yang,

Ai-Jun Miao\*

State Key Laboratory of Pollution Control and Resource Reuse, School of the Environment,  
Nanjing University, Nanjing, Jiangsu Province, 210046, China

<sup>#</sup>These authors contributed equally.

\*Corresponding author:

A.-J. Miao, School of the Environment, Nanjing University, Mail box 24, Xianlin Road 163,  
Nanjing 210046, Jiangsu Province, China PRC (mailing address), 86-25-89680255 (phone),  
86-25-89680569 (fax), miaoaj@nju.edu.cn (email)

## Calculation of the particle-number- and surface-area-based concentration of

### <sup>QDs</sup>AmSiNPs in the medium and their respective uptake rate

Taking into account the porous nature of the <sup>QDs</sup>AmSiNPs, the particle number per unit mass of Si ( $N$ , particles  $\text{pg Si}^{-1}$ ) was calculated according to Eq. (S1):

$$N = \frac{\frac{1}{\rho} + V}{\frac{4}{3}\pi r^3} \quad (\text{S1})$$

where  $\rho$  represents the physical density of amorphous  $\text{SiO}_2$  ( $1.03 \text{ g Si cm}^{-3}$ ),  $V$  the pore volume of <sup>QDs</sup>AmSiNPs as measured by  $\text{N}_2$  desorption analysis ( $\text{cm}^3 \text{ g Si}^{-1}$ ), and  $r$  the radius of the NPs ( $\mu\text{m}$ ). Based on Eq. (S1),  $[\text{AmSiNPs}]_{\text{med-N}}$  and  $V_N$  could be calculated as shown in Eqs. (S2) and (S3):

$$[\text{AmSiNPs}]_{\text{med-N}} = [\text{AmSiNPs}]_{\text{med-m}} \times N \times 10^9 \quad (\text{S2})$$

$$V_N = V_m \times N \quad (\text{S3})$$

According to  $[\text{AmSiNPs}]_{\text{med-N}}$  and  $V_N$ ,  $[\text{AmSiNPs}]_{\text{med-S}}$  and  $V_S$  were further calculated using Eqs. (S4) and (S5):

$$[\text{AmSiNPs}]_{\text{med-S}} = [\text{AmSiNPs}]_{\text{med-N}} \times 4\pi r^2 \quad (\text{S4})$$

$$V_S = V_N \times 4\pi r^2 \quad (\text{S5})$$

Here, the surface area ( $4\pi r^2$ ,  $\mu\text{m}^2 \text{ particle}^{-1}$ ), as the area of the outer surface of <sup>QDs</sup>AmSiNPs (not including the area of the pore surface), was used instead of the specific surface area.

Although the latter was much higher than the former, the area of the pore surface is hardly able to contact the cell membrane such that its contribution to the speed of membrane

39     invagination can be considered to have been negligible and was not used herein.

40

41

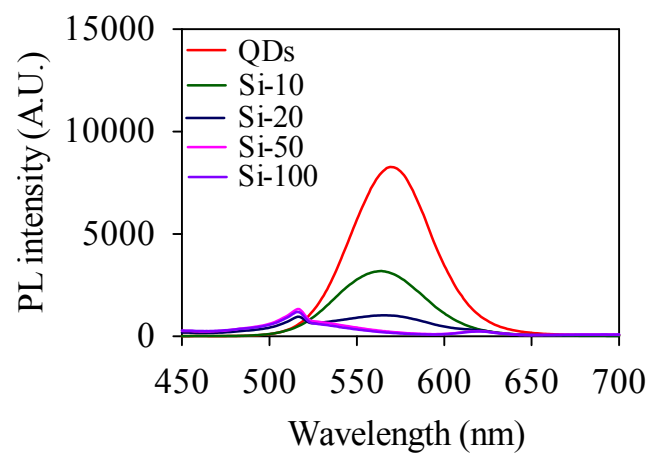

**Fig. S1** The photoluminescence intensity of QDs, Si-10, Si-20, Si-50, and Si-100.

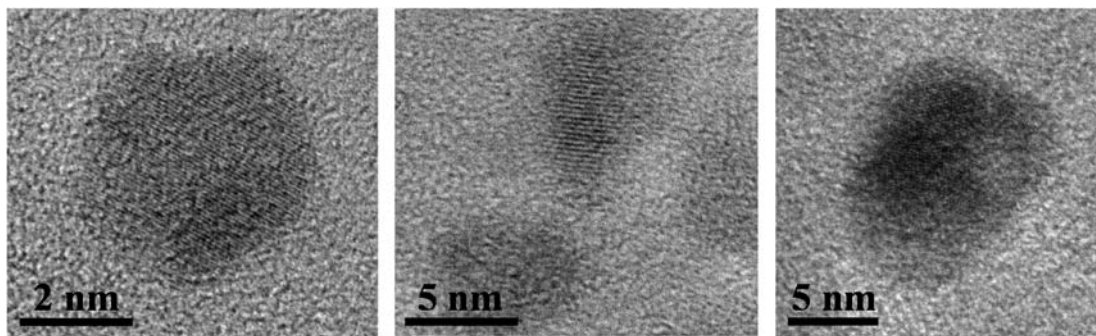

45

46

**Fig. S2** The high resolution TEM image of (A) CdSeTe, (B) QDs, and (C) Si-10.

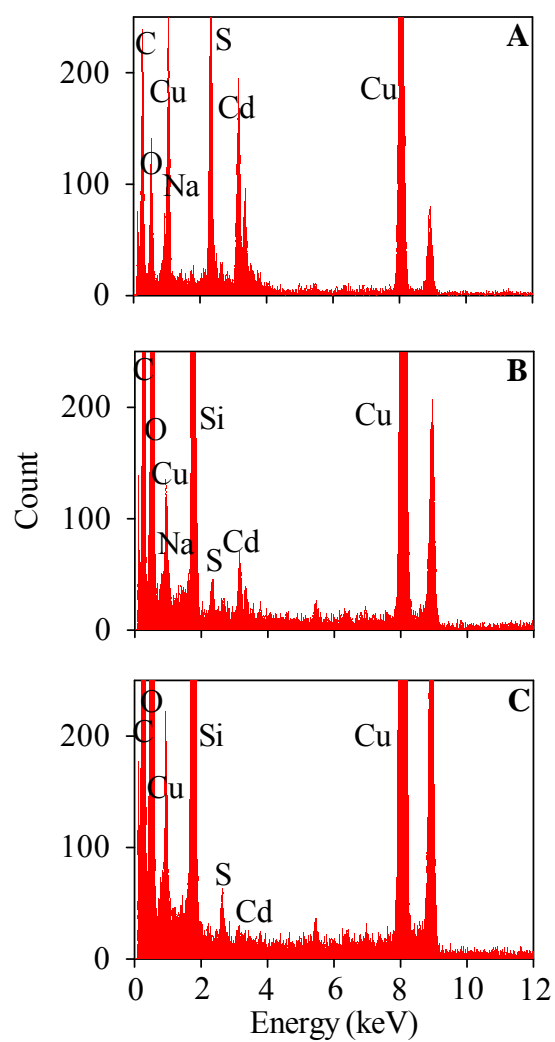

**Fig. S3** The energy-dispersive X-ray spectra of (A) CdSeTe, (B) QDs, and (C) Si-10.
